# Supplementary material
Source: PubMed Central journal article supplement (PMC153653)
Supplement: pnas_0230374100_2.pdf [file pnas_0230374100_2.pdf]

# endoGPCR Genes

| Class A                    |                       |             |                 | Class A                       |                   |                 |              | Class A         |         |                 |                  | Class A                         |                        |                                       |                 | Class B                             |                 |                               |           |     |     |
|----------------------------|-----------------------|-------------|-----------------|-------------------------------|-------------------|-----------------|--------------|-----------------|---------|-----------------|------------------|---------------------------------|------------------------|---------------------------------------|-----------------|-------------------------------------|-----------------|-------------------------------|-----------|-----|-----|
| Family                     | Gene                  | Database ID | Species         | Family                        | Gene              | Database ID     | Species      | Family          | Gene    | Database ID     | Species          | Family                          | Gene                   | Database ID                           | Species         | Family                              | Gene            | Database ID                   | Species   |     |     |
| Acetylcholine (muscarinic) | CHRM1                 | #1          | H.M             | GnRH                          | GNRHR             | #87             | H.M          | Prokinetin 2    | GPR73   | #173            | H.M              | Orphan group A6                 | *GPR45                 | #260                                  | H.M             | Parathyroid hormone                 | PTH1R1          | #343                          | H.M       |     |     |
|                            | CHRM2                 | 2           | H.M             |                               | GNRHR2            | 88              | H            |                 | GPR73L1 | 174             | H.M              |                                 | *GPR63                 | 261                                   | H.M             |                                     | PTH2R2          | 344                           | H.M       |     |     |
|                            | CHRM3                 | 3           | H.M             |                               | Histamine         | HRH1            | 89           |                 | H.M     | GPR10           | 175              |                                 | H.M                    | *GPR83                                | 262             |                                     | H.M             | Secretin                      | SECRET    | 345 | H.M |
|                            | CHRM4                 | 4           | H.M             |                               |                   | HRH2            | 90           |                 | H.M     | F2R             | 176              |                                 | H.M                    | *PGR15                                | 263             |                                     | M               | PACAP                         | ADCYAP1R1 | 346 | H.M |
|                            | CHRM5                 | 5           | H.M             |                               |                   | HRH3            | 91           |                 | H.M     | F2RL1           | 177              |                                 | H.M                    | *PGR15L                               | 264             |                                     | M               | Vasoactive intestinal peptide | VIPR1     | 347 | H.M |
| Adenosine                  | ADORA1                | 6           | H.M             | HRH4                          | 92                | H.M             | F2RL2        | 178             | H.M     | Orphan group A8 | *GPR103          | 265                             | H.M                    | Brain-specific angiogenesis inhibitor | *BA1            | 349                                 | H.M             |                               |           |     |     |
|                            | ADORA2A               | 7           | H.M             | Hormone protein               | FSHR              | 93              | H.M          | F2RL3           | 179     |                 | H.M              | *GPR103L                        | 266                    | M                                     | *BA2            | 350                                 | H.M             |                               |           |     |     |
|                            | ADORA2B               | 8           | H.M             |                               | LHCGR             | 94              | H.M          | Purinocceptor   | P2RY1   |                 | 180              | H.M                             | *GRC                   | 267                                   | H.M             | *BA3                                | 351             | H.M                           |           |     |     |
|                            | ADORA3                | 9           | H.M             |                               | TSHR              | 95              | H.M          |                 | P2RY2   |                 | 181              | H.M                             | *PGR1                  | 268                                   | H.M             | DAF                                 | CD97            | 352                           | H.M       |     |     |
| ADP/UDP-glucose            | P2RY12                | 10          | H.M             |                               | KISS-1            | GPR54           | 96           | H.M             | P2RY4   | 182             | H.M              | Orphan group A9                 | *HGPCR11               | 269                                   | H.M             | EGF-like, mucin-like receptor (EMR) | *EMR1           | 353                           | H.M       |     |     |
|                            | GPR105                | 11          | H.M             | Leukotriene                   | LTB4R             | 97              | H.M          | P2RY6           | 183     | H.M             | *SALPR           |                                 | 270                    | H.M                                   | *EMR2           | 354                                 | H               |                               |           |     |     |
|                            | GPR86                 | 12          | H.M             | LTB4R2                        | 98                | H.M             | P2RY11       | 184             | H       | *GPR90          | 271              |                                 | H.M                    | *EMR3                                 | 355             | H                                   |                 |                               |           |     |     |
|                            | *GPR87                | 13          | H.M             | MAS-related gene              | MRGX1             | 99              | H            | LGR7            | 185     | H.M             | *P2Y5            |                                 | 273                    | H.M                                   | *PGR3           | 277                                 | H.M             | Latrophilin                   | *LEC1     | 357 | H.M |
| Adrenoceptor               | ADRA1A                | 14          | H.M             |                               | MRGX2             | 100             | H            | LGR8            | 186     | H.M             | Orphan group A10 | *GPR11                          | 274                    | H.M                                   | *EMR1           | 358                                 | H.M             |                               |           |     |     |
|                            | ADRA1B                | 15          | H.M             |                               | MRGX3             | 101             | H            | RGR             | 187     | H.M             |                  | *GPR23                          | 274                    | H.M                                   | *EMR2           | 359                                 | H.M             |                               |           |     |     |
|                            | ADRA1D                | 16          | H.M             |                               | MRGX4             | 102             | H            | Retinal         | HTR1A   | 188             |                  | H.M                             | Orphan group A11       | *P2Y10                                | 275             | H.M                                 | *EMR3           | 356                           | H.M       |     |     |
|                            | ADRA2A                | 17          | H.M             |                               | *MRGD             | 103             | H.M          |                 | HTR1B   | 189             |                  | H.M                             |                        | *GPR23                                | 276             | H.M                                 | *EMR4           | 357                           | H.M       |     |     |
|                            | ADRA2B                | 18          | H.M             |                               | *MigA1            | 104             | M            | HTR1D           | 190     | H.M             | Orphan group A12 | *P2Y5                           |                        | 277                                   | H.M             | *EMR5                               | 358             | H.M                           |           |     |     |
|                            | ADRA2C                | 19          | H.M             |                               | *MigA2            | 105             | M            | HTR1E           | 191     | H               |                  | *GPR23                          |                        | 278                                   | H.M             | *EMR6                               | 359             | H.M                           |           |     |     |
|                            | ADRB1                 | 20          | H.M             |                               | *MigA3            | 106             | M            | HTR1F           | 192     | H.M             | Orphan group A13 | *P2Y10                          | 279                    | H.M                                   | *EMR7           | 360                                 | H.M             |                               |           |     |     |
|                            | ADRB2                 | 21          | H.M             |                               | *MigA4            | 107             | M            | HTR2A           | 193     | H.M             |                  | *FKSG79                         | 279                    | H.M                                   | *EMR8           | 361                                 | H.M             |                               |           |     |     |
|                            | ADRB3                 | 22          | H.M             |                               | *MigA5            | 108             | M            | HTR2B           | 194     | H.M             | Orphan group A14 | *PGR2                           | 278                    | H.M                                   | *EMR9           | 362                                 | H.M             |                               |           |     |     |
|                            | Adrenomedullin        | ADM         | 23              |                               | H.M               | *MigA6          | 109          | M               | HTR2C   | 195             |                  | H.M                             | *PGR3                  | 277                                   | H.M             | *EMR10                              | 363             | H.M                           |           |     |     |
| Anaphylatoxin              |                       | C3AR1       | 24              |                               | H.M               | *MigA7          | 110          | M               | HTRA    | 196             | H.M              | Other Orphan Genes              | *AGR9                  | 279                                   | H.M             | *EMR11                              | 364             | H.M                           |           |     |     |
|                            | CSR1                  | 25          | H.M             |                               | *MigA8            | 111             | M            | HTR5A           | 197     | H.M             | *CMKLR1          |                                 | 280                    | H.M                                   | *EMR12          | 365                                 | H.M             |                               |           |     |     |
|                            | GPR77                 | 26          | H.M             |                               | *MigA9            | 112             | M            | HTR5B           | 198     | M               | *EB2             | 281                             | H.M                    | *EMR13                                | 366             | H.M                                 |                 |                               |           |     |     |
| Angiotensin                | AGTR1                 | 27          | H.M             |                               | *MigA10           | 113             | M            | HTR6            | 199     | H.M             | *GPR150          | 282                             | H.M                    | Orphan group B1                       | *GPR64          | 367                                 | H.M             |                               |           |     |     |
|                            | AGTR2                 | 28          | H.M             | *MigA11                       | 114               | M               | HTR7         | 200             | H.M     | *GPR1           | 283              | H.M                             | *EMR14                 |                                       | 368             | H.M                                 |                 |                               |           |     |     |
| Apelin                     | AGTRL1                | 29          | H.M             | *MigA12                       | 115               | M               | Somatostatin | SSTR1           | 201     | H.M             | *GPR17           | 286                             | H.M                    | Orphan group B2                       | *EMR15          | 369                                 | H.M             |                               |           |     |     |
|                            | Bombesin              | BRS3        | 30              | H.M                           | *MigA13           | 116             |              | M               | SSTR2   | 202             | H.M              | *GPR18                          | 287                    |                                       | H.M             | *EMR16                              | 370             | H.M                           |           |     |     |
| GRPR                       |                       | 31          | H.M             | *MigA14                       | 117               | M               | SSTR3        | 203             | H.M     | *GPR20          | 288              | H.M                             | Orphan group B3        | *EMR17                                | 371             | H.M                                 |                 |                               |           |     |     |
| NMBR                       | 32                    | H.M         | *MigA15         | 118                           | M                 | SSTR4           | 204          | H.M             | *GPR22  | 289             | H.M              | *EMR18                          |                        | 372                                   | H.M             |                                     |                 |                               |           |     |     |
| Bradykinin                 | BDKRB1                | 33          | H.M             | *MigA16                       | 119               | M               | SSTR5        | 205             | H.M     | *GPR25          | 290              | H.M                             | Other Orphan Genes     | *ETL                                  | 373             | H.M                                 |                 |                               |           |     |     |
|                            | BDKRB2                | 34          | H.M             | *MigA19                       | 120               | M               | SPC/LPC      | G2A             | 206     | H.M             | *GPR30           | 291                             |                        | H.M                                   | *FLJ14454       | 374                                 | H.M             |                               |           |     |     |
| Cannabinoid                | CNR1                  | 35          | H.M             | *MigB1                        | 121               | M               |              | GPR4            | 207     | H.M             | *GPR32           | 293                             | H                      | *GPR56                                | 375             | H.M                                 |                 |                               |           |     |     |
|                            | CNR2                  | 36          | H.M             | *MigB2                        | 122               | M               | GPR65        | 208             | H.M     | *GPR33          | 294              | M                               | *OA1                   | 376                                   | H.M             |                                     |                 |                               |           |     |     |
| Chemokine                  | CCR1                  | 37          | H.M             | *MigB3                        | 123               | M               | GPR88        | 209             | H.M     | *GPR34          | 295              | H.M                             | *PGR27                 | 377                                   | H.M             |                                     |                 |                               |           |     |     |
|                            | CCR2                  | 38          | H.M             | *MigB4                        | 124               | M               | Sphingolipid | EDG1            | 210     | H.M             | *GPR35           | 296                             | H.M                    | *PGR23                                | 378             | H.M                                 |                 |                               |           |     |     |
|                            | CCR3                  | 39          | H.M             | *MigB5                        | 125               | M               |              | EDG2            | 211     | H.M             | *GPR39           | 297                             | H.M                    | *PGR24                                | 379             | H                                   |                 |                               |           |     |     |
|                            | CCR4                  | 40          | H.M             | *MigB6                        | 126               | M               | EDG3         | 212             | H.M     | *GPR40          | 298              | H.M                             | *PGR25                 | 380                                   | H.M             |                                     |                 |                               |           |     |     |
|                            | CCR5                  | 41          | H.M             | *MigB8                        | 127               | M               | EDG4         | 213             | H.M     | *GPR44          | 299              | H.M                             | *PGR26                 | 381                                   | H.M             |                                     |                 |                               |           |     |     |
|                            | CCR6                  | 42          | H.M             | *MigB10                       | 128               | M               | EDG5         | 214             | H.M     | *GPR45          | 300              | H.M                             | *PGR27                 | 382                                   | H.M             |                                     |                 |                               |           |     |     |
|                            | CCR7                  | 43          | H.M             | *MigB11                       | 129               | M               | EDG6         | 215             | H.M     | *GPR61          | 301              | H.M                             | *PGR21                 | 383                                   | H.M             |                                     |                 |                               |           |     |     |
|                            | CCR8                  | 44          | H.M             | *MigB13                       | 130               | M               | EDG7         | 216             | H.M     | *GPR62          | 302              | H.M                             | Class C                | Calcium-sensing                       | CASR            | 384                                 | H.M             |                               |           |     |     |
|                            | CCR9                  | 45          | H.M             | Melanin-concentrating hormone | GPR24             | 131             | H.M          | EDG8            | 217     | H.M             | *GPR75           | 303                             |                        |                                       | H.M             | GABA-B                              | GABBR1          | 385                           | H.M       |     |     |
|                            | GPR2                  | 46          | H.M             |                               | SLT               | 132             | H            | Tachykinin      | TACR1   | 218             | H.M              | *GPR80                          | 305                    | H.M                                   | GPR56           | GPR56                               | 386             | H.M                           |           |     |     |
|                            | CCRL1                 | 47          | H.M             | Melanocortin                  | MC1R              | 133             | H.M          |                 | TACR2   | 219             | H.M              | *GPR82                          | 306                    | H.M                                   | GPRC5           | *GPRC5B                             | 387             | H.M                           |           |     |     |
|                            | CCRL2                 | 48          | H               |                               | MC2R              | 134             | H.M          | TACR3           | 220     | H.M             | *GPR84           | 306                             | H.M                    | *GPRC5C                               |                 | 388                                 | H.M             |                               |           |     |     |
| CCBP2                      | 49                    | H.M         | MC3R            |                               | 135               | H.M             | TRH          | TRHR            | 221     | H.M             | *GPR88           | 307                             | H.M                    | *GPRC5D                               | 389             | H.M                                 |                 |                               |           |     |     |
| *CMKBR1L1                  | 50                    | M           | MC4R            | 136                           | H.M               | TRHR2           |              | 222             | M       | *GPR91          | 308              | H.M                             | *GPRC5E                | 390                                   | H.M             |                                     |                 |                               |           |     |     |
| *CMKBR1L2                  | 51                    | M           | MCSR            | 137                           | H.M               | Trace amine     | *GPR57       | 223             | H.M     | *GPR92          | 309              | H.M                             | Metabotropic glutamate | GRM1                                  | 391             | H.M                                 |                 |                               |           |     |     |
| CCXCR1                     | 52                    | H.M         | Melatonin       | MTNR1A                        | 138               |                 | H.M          | *GPR58          | 224     | H.M             | *GPR101          | 310                             |                        | H.M                                   | GRM2            | 392                                 | H.M             |                               |           |     |     |
| CX3CR1                     | 53                    | H.M         |                 | MTNR1B                        | 139               | H.M             | *PNR         | 225             | H.M     | *H963           | 311              | H.M                             | GRM3                   | 393                                   | H.M             |                                     |                 |                               |           |     |     |
| IL8RA                      | 54                    | H.M         |                 | *GPR50                        | 140               | H.M             | TAR1         | 226             | H.M     | *HGPCR2         | 312              | H.M                             | GRM4                   | 394                                   | H.M             |                                     |                 |                               |           |     |     |
| IL8RB                      | 55                    | H.M         | Neurokinin U    | GPR66                         | 141               | H.M             | TAR2         | 227             | M       | *HGPCR19        | 313              | H.M                             | GRM5                   | 395                                   | H.M             |                                     |                 |                               |           |     |     |
| GPR9                       | 56                    | H.M         |                 | NMU2R                         | 142               | H.M             | *TAR3        | 228             | H.M     | *HUMNP1Y20      | 314              | H.M                             | GRM6                   | 396                                   | H.M             |                                     |                 |                               |           |     |     |
| CXCR4                      | 57                    | H.M         | Neuropeptide FF | NPFF1R                        | 143               | H.M             | *TAR4        | 229             | H.M     | *MRG            | 315              | H                               | GRM7                   | 397                                   | H.M             |                                     |                 |                               |           |     |     |
| BLR1                       | 58                    | H.M         |                 | GPR74                         | 144               | H.M             | *GPR102      | 230             | H       | *MRGE           | 316              | H.M                             | GRM8                   | 398                                   | H.M             |                                     |                 |                               |           |     |     |
| CXCR6                      | 59                    | H.M         | Neuropeptide W  | GPR7                          | 145               | H.M             | *TA7         | 231             | M       | *MRGF           | 317              | H.M                             | Other Orphan Genes     | *GPRC6A                               | 399             | H.M                                 |                 |                               |           |     |     |
| Cholecystokinin            | CKAR                  | 60          |                 | H.M                           | GPR8              | 146             | H            | *TA8            | 232     | M               | *MRGG            | 318                             |                        | H.M                                   | *GPR28          | 400                                 | H.M             |                               |           |     |     |
|                            | CCKBR                 | 61          | H.M             | Neuropeptide Y                | NPY1R             | 147             | H.M          | *TA9            | 233     | M               | *OPN3            | 319                             | H.M                    | Class F/S                             | Friedland       | FZD1                                | 401             | H.M                           |           |     |     |
| CYSLT1                     | 62                    | H.M         | NPY2R           |                               | 148               | H.M             | *TA10        | 233             | M       | *OPN4           | 320              | H.M                             | FZD2                   |                                       |                 | 402                                 | H.M             |                               |           |     |     |
| CYSLT2                     | 63                    | H.M         | PPYR1           | 149                           | H.M               | *TA11           | 234          | M               | *PGR4   | 321             | H.M              | FZD3                            | 403                    | H.M                                   |                 |                                     |                 |                               |           |     |     |
| Dopamine                   | DRD1                  | 64          | H.M             | NPY5R                         | 150               | H.M             | *TA12        | 235             | M       | *PGR5           | 322              | H.M                             | FZD4                   | 404                                   | H.M             |                                     |                 |                               |           |     |     |
|                            | DRD2                  | 65          | H.M             | NPY6R                         | 151               | M               | *TA14        | 236             | M       | *PGR6           | 323              | H                               | FZD5                   | 405                                   | H.M             |                                     |                 |                               |           |     |     |
|                            | DRD3                  | 66          | H.M             | Neurotensin                   | NTSR1             | 152             | H.M          | *TA15           | 237     | M               | *PGR7            | 324                             | H.M                    | FZD6                                  | 406             | H.M                                 |                 |                               |           |     |     |
|                            | DRD4                  | 67          | H.M             |                               | NTSR2             | 153             | H.M          | Urotensin II    | GPR14   | 238             | H.M              | *PGR8                           | 325                    | H.M                                   | FZD7            | 407                                 | H.M             |                               |           |     |     |
|                            | DRD5                  | 68          | H.M             | Opioid/nociceptin             | OPRD1             | 154             | H.M          |                 | AVPR1A  | 239             | H.M              | *PGR9                           | 326                    | H.M                                   | FZD8            | 408                                 | H.M             |                               |           |     |     |
| Duffy                      | FY                    | 69          | H.M             |                               | OPRK1             | 155             | H.M          | AVPR1B          | 240     | H.M             | *PGR10           | 326                             | H.M                    | FZD9                                  | 409             | H.M                                 |                 |                               |           |     |     |
|                            | Eicosanoid            | TG1019      | 70              | H                             | OPRM1             | 156             | H.M          | AVPR2           | 241     | H.M             | *PGR11           | 327                             | H.M                    | FZD10                                 | 410             | H                                   |                 |                               |           |     |     |
| *HM74                      |                       | 71          | H.M             | OPRL1                         | 157               | H.M             | OXR          | 242             | H.M     | *PGR12          | 328              | H.M                             | Smoothed               | SMOCH                                 | 411             | H.M                                 |                 |                               |           |     |     |
| *GPR81                     |                       | 72          | H.M             | Opsin                         | OPN1LW            | 158             | H            | LGR             | *GPR48  | 243             | H.M              | *PGR13                          |                        | 329                                   | H.M             | No class                            | Orphan group N1 | *TM7SF1                       | 412       | H.M |     |
| Endothelin                 | EDNRA                 | 73          | H.M             |                               | OPN1MW            | 159             | H.M          | *GPR49          | 244     | H.M             | *RDC1            | 331                             | H.M                    | *TM7SF1L1                             | 413             |                                     |                 | H.M                           |           |     |     |
|                            | EDNRB                 | 74          | H.M             | OPN1SW                        | 160               | H.M             | *LGR6        | 245             | H.M     | *RE2            | 332              | H.M                             | *TM7SF1L2              | 414                                   | H.M             |                                     |                 |                               |           |     |     |
|                            | FMPLP-related peptide | FFR1        | 75              | H.M                           | RHO               | 161             | H.M          | SREB            | *GPR27  | 246             | H.M              | Class B                         | Calcitonin             | CALCR                                 | 334             | H.M                                 |                 |                               |           |     |     |
|                            |                       | FFRL1       | 76              | H                             | Orexin/Hypocretin | HCTR1R          | 162          |                 | H.M     | *GPR85          | 247              |                                 |                        | H.M                                   | CALCLR          | 335                                 | H.M             | CRHR1                         | 336       | H.M |     |
| FFRL2                      |                       | 77          | H               | HCTR2R                        |                   | 163             | H.M          | *SREB3          | 248     | H.M             | *GPR12           | 251                             | H.M                    | CRHR2                                 | 337             | H.M                                 |                 |                               |           |     |     |
| FFR-RS1                    |                       | 78          | M               | PAF                           | PTAFR             | 164             | H.M          | Orphan group A1 | *GPR3   | 249             | H.M              | Orphan group A2                 | *GPR21                 | 252                                   | H.M             | GIP                                 | GIPR            | 338                           | H.M       |     |     |
| *FPR-RS2                   | 79                    | M           | Prostanoid      | PTGDR                         | 165               | H.M             | *GPR6        |                 | 250     | H.M             | *GPR22           |                                 | 252                    | H.M                                   | Orphan group A3 | *GPR26                              | 254             | H.M                           |           |     |     |
| *FPR-RS3                   | 80                    | M           |                 | PTGER1                        | 166               | H.M             | *GPR12       | 251             | H.M     | *GPR52          | 253              | H.M                             | Orphan group A4        | *GPR78                                |                 | 255                                 | H               |                               |           |     |     |
| *FPR-RS4                   | 81                    | M           | PTGER2          | 167                           | H.M               | Orphan group A5 | *GPR25       | 250             | H.M     | *GPR37          | 256              | H.M                             |                        | GHRH                                  | GHRHR           | 342                                 | H.M             |                               |           |     |     |
| Galaniin                   | GALR1                 | 82          | H.M             | PTGER3                        | 168               |                 | H.M          | *GPR41          | 258     | H.M             | Class B          | Corticotropin-releasing hormone | CRHR1                  |                                       | 336             | H.M                                 |                 |                               |           |     |     |
|                            | GALR2                 | 83          | H.M             | PTGER4                        | 169               | H.M             | *GPR43       | 259             | H.M     | Orphan group A6 |                  |                                 | *GPR63                 | 261                                   | H.M             |                                     |                 |                               |           |     |     |
|                            |                       |             |                 |                               |                   |                 |              |                 |         |                 |                  |                                 |                        |                                       |                 |                                     |                 |                               |           |     |     |
