# Supplementary material
Source: PubMed Central journal article supplement (PMC153653)
Supplement: pnas_0230374100v2_2.pdf [file pnas_0230374100v2_2.pdf]

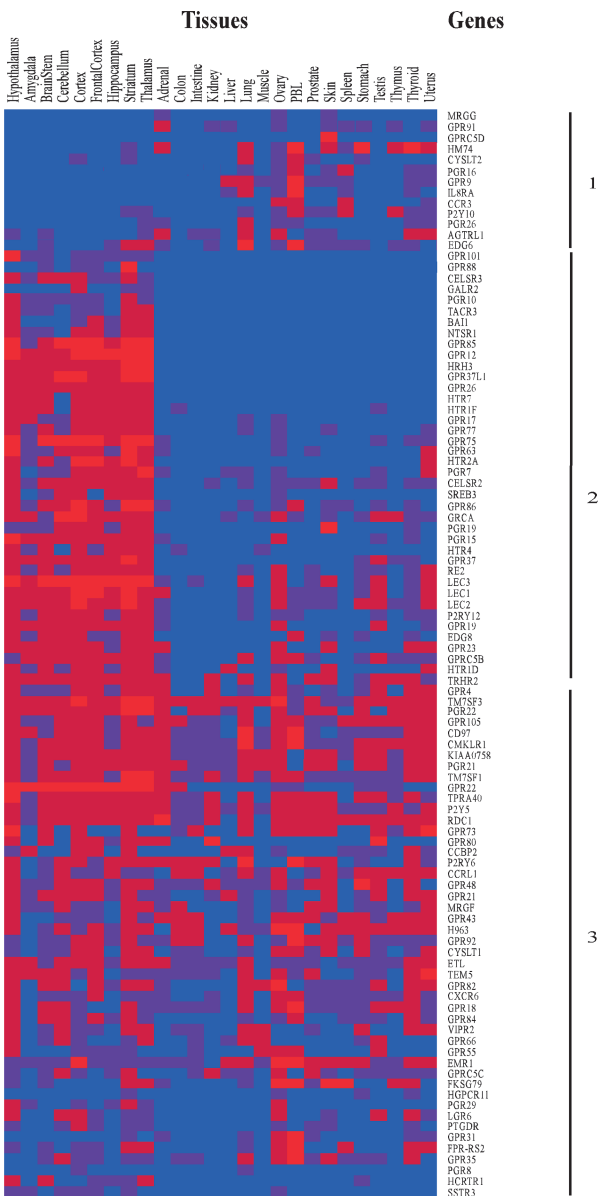

**Fig. 3.** Summary of tissue expression of 100 endoGPCR genes. Genes were analyzed individually by RT-PCR as shown and the intensity of the observed bands determined by scanning. Each gene is represented by a single row of colored boxes, with four different expression levels: no expression, blue; low expression, purple; moderate expression, dark red; strong expression, pure red. Gene and tissues, as well as groups of expression patterns, are indicated.
